# Supplementary material
Source: Springer Nature journal article supplement (https://www.springermedizin.de/resource/supplementary/12936_2008_817_MOESM4_ESM.pdf/9548998)

**A**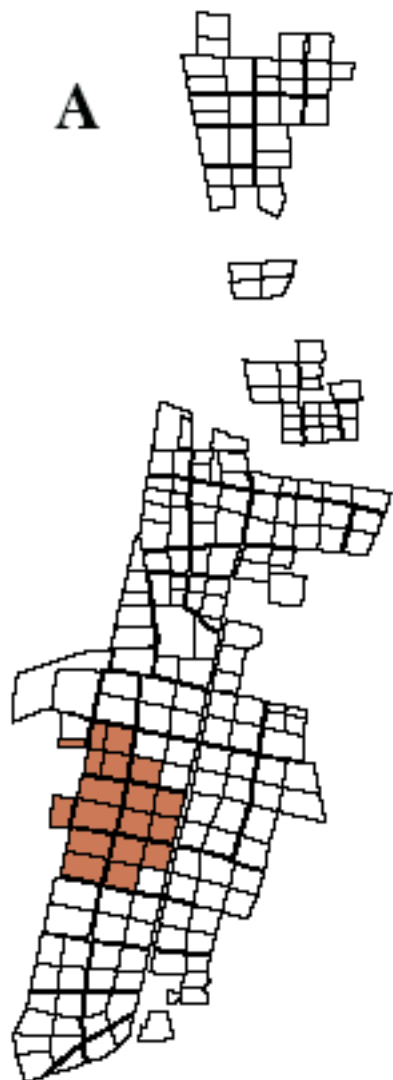**B**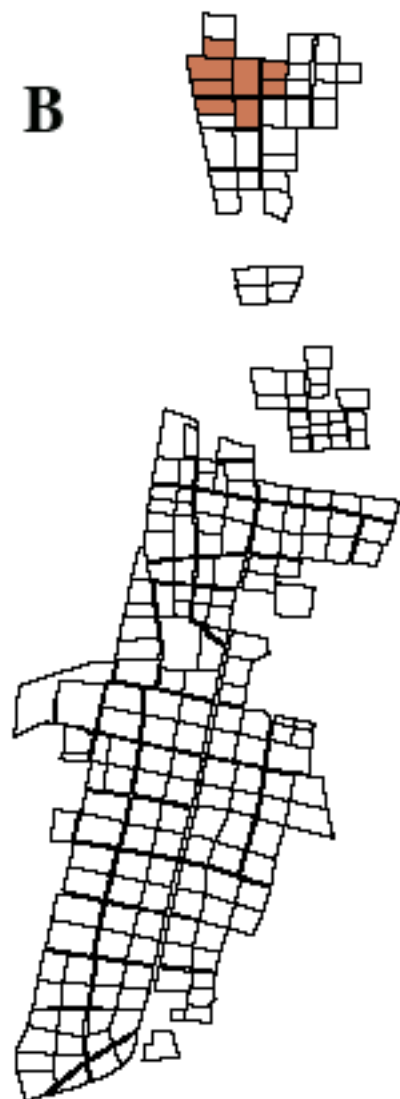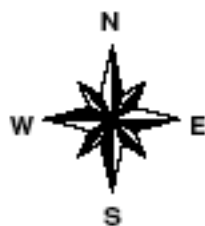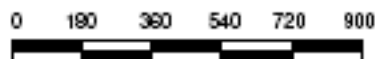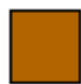

Cluster 1  
 $p = 0.004$

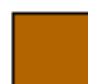

Cluster 1  
 $p = 0.004$

Supplement: MOESM4 [file 9548998]
